# Supplementary material for: Nature and Mental Health in Urban Texas: A NatureScore-Based Study
Source: MDPI journal article supplement (doi:10.3390/ijerph21020168), 2024-02-01
Supplement: s1 [file s1]

## Supplementary Figures

**Figure S1. Correlation matrix showing the relationship between the various socio-economic factors and NatureScore.**

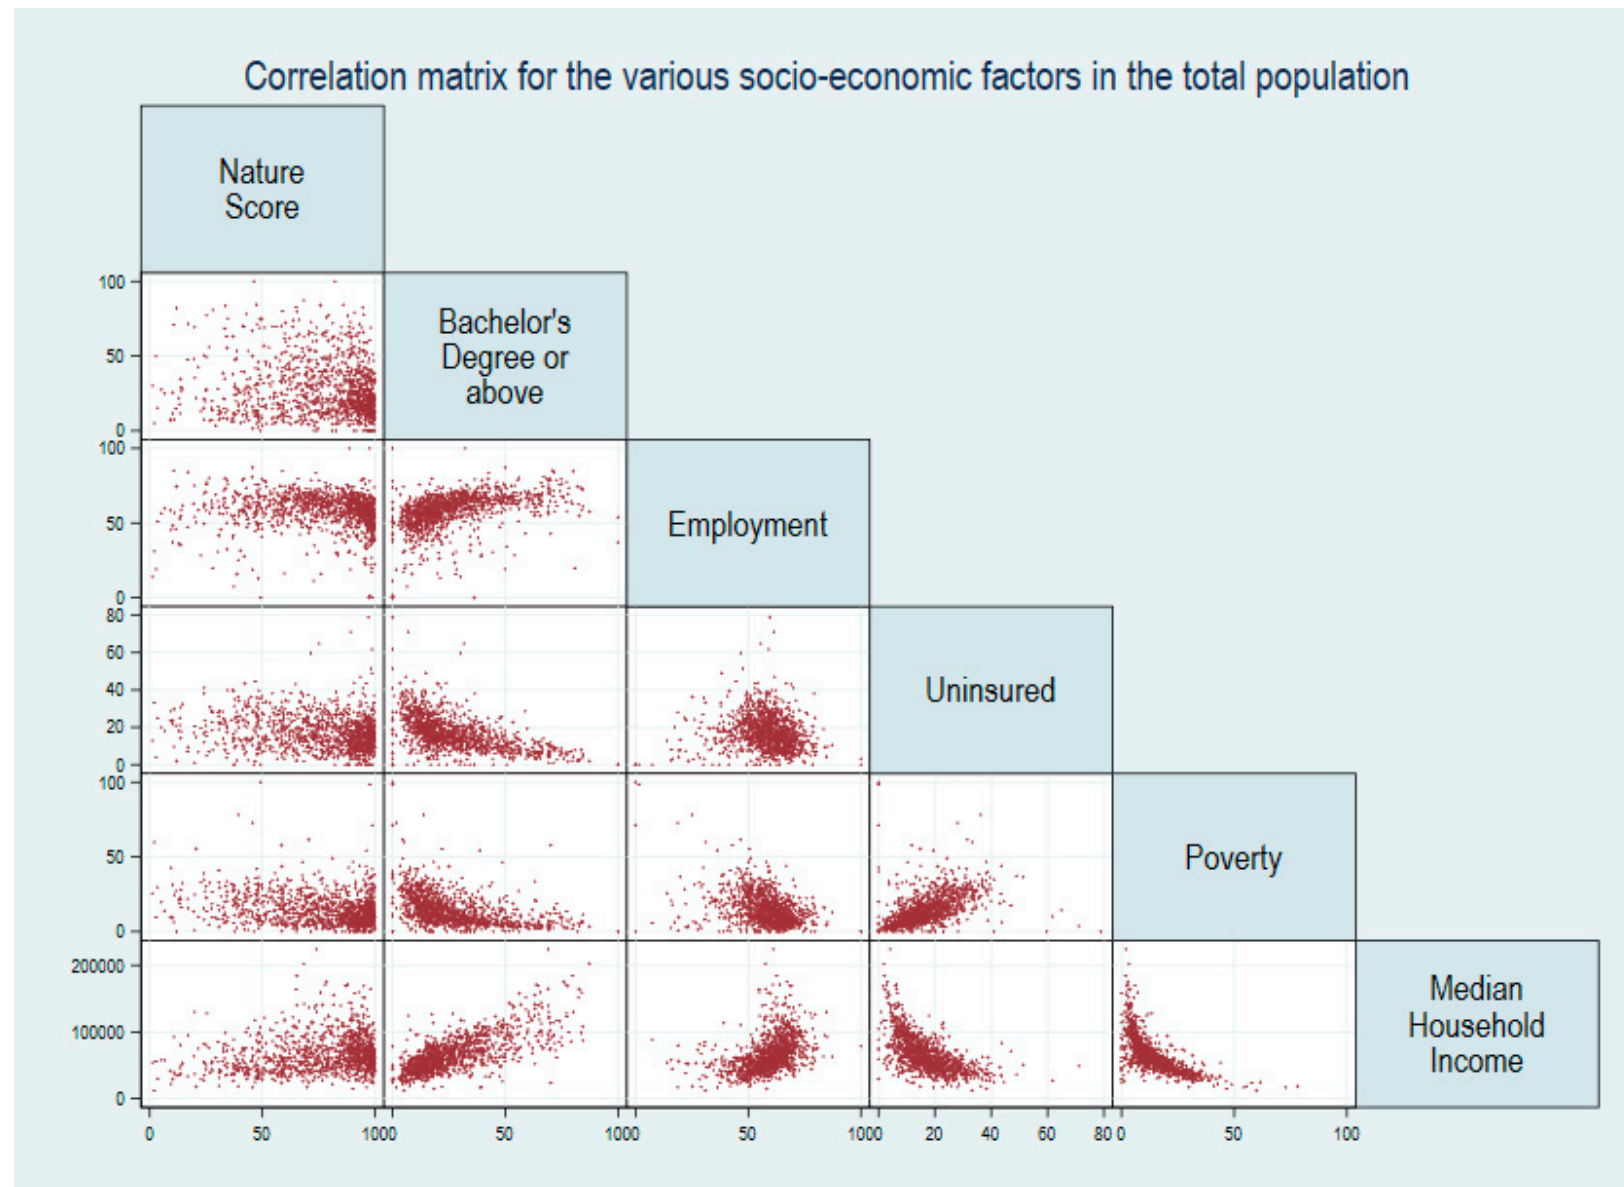

**Figure S2. Satellite images of neighborhoods with different NatureScores**

**Nature  
Deficient**  
(0-19.9)

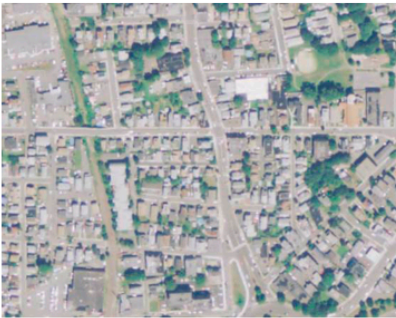

**Nature  
Light**  
(20-39.9)

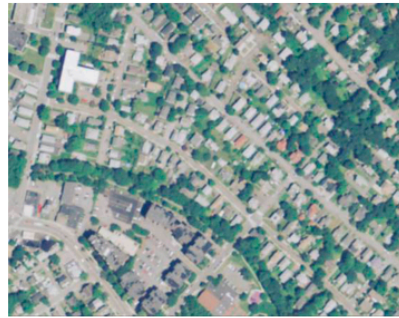

**Nature  
Adequate**  
(40-59.9)

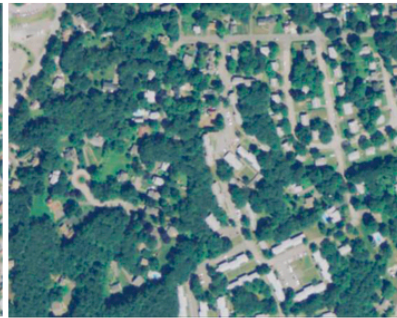

**Nature  
Rich**  
(60-79.9)

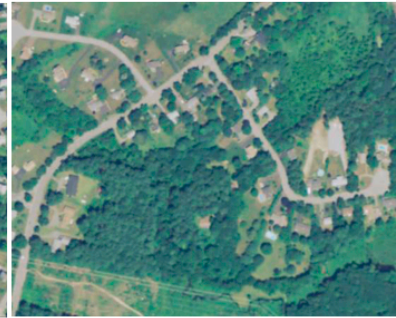

**Nature  
Utopia**  
(80-100)

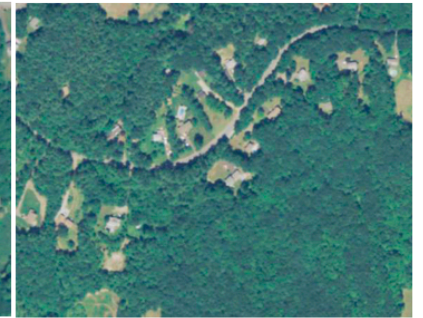

## Supplementary Tables

**Table S1. List of ICD-10 CM and ICD-9 codes used to define depression.**

| <b>ICD-10 CM / DESCRIPTION</b> |                                                                              |
|--------------------------------|------------------------------------------------------------------------------|
| <b>ICD-9</b>                   |                                                                              |
| <b>F320</b>                    | Major depressive disorder, single episode, mild                              |
| <b>F321</b>                    | Major depressive disorder, single episode, moderate                          |
| <b>F322</b>                    | Major depressive disorder, single episode, severe without psychotic features |
| <b>F323</b>                    | Major depressive disorder, single episode, severe with psychotic features    |
| <b>F324</b>                    | Major depressive disorder, single episode, in partial remission              |
| <b>F325</b>                    | Major depressive disorder, single episode, in full remission                 |
| <b>F3289</b>                   | Other specified depressive episodes                                          |
| <b>F329</b>                    | Major depressive disorder, single episode, unspecified                       |
| <b>F32A</b>                    | Depression, unspecified                                                      |
| <b>F330</b>                    | Major depressive disorder, recurrent, mild                                   |
| <b>F331</b>                    | Major depressive disorder, recurrent, moderate                               |
| <b>F332</b>                    | Major depressive disorder, recurrent severe without psychotic features       |

|              |                                                                                                    |
|--------------|----------------------------------------------------------------------------------------------------|
| <b>F333</b>  | Major depressive disorder, recurrent, severe with psychotic symptoms                               |
| <b>F3340</b> | Major depressive disorder, recurrent, in remission, unspecified                                    |
| <b>F3341</b> | Major depressive disorder, recurrent, in partial remission                                         |
| <b>F3342</b> | Major depressive disorder, recurrent, in full remission                                            |
| <b>F338</b>  | Other recurrent depressive disorders                                                               |
| <b>F339</b>  | Major depressive disorder, recurrent, unspecified                                                  |
| <b>29620</b> | Major depressive affective disorder, single episode, unspecified                                   |
| <b>29621</b> | Major depressive affective disorder, single episode, mild                                          |
| <b>29622</b> | Major depressive affective disorder, single episode, moderate                                      |
| <b>29623</b> | Major depressive affective disorder, single episode, severe, without mention of psychotic behavior |
| <b>29624</b> | Major depressive affective disorder, single episode, severe, specified as with psychotic behavior  |
| <b>29625</b> | Major depressive affective disorder, single episode, in partial or unspecified remission           |
| <b>29626</b> | Major depressive affective disorder, single episode, in full remission                             |
| <b>29630</b> | Major depressive affective disorder, recurrent episode, unspecified                                |
| <b>29631</b> | Major depressive affective disorder, recurrent episode, mild                                       |
| <b>29632</b> | Major depressive affective disorder, recurrent episode, moderate                                   |

|              |                                                                                                       |
|--------------|-------------------------------------------------------------------------------------------------------|
| <b>29633</b> | Major depressive affective disorder, recurrent episode, severe, without mention of psychotic behavior |
| <b>29634</b> | Major depressive affective disorder, recurrent episode, severe, specified as with psychotic behavior  |
| <b>29635</b> | Major depressive affective disorder, recurrent episode, in partial or unspecified remission           |
| <b>29636</b> | Major depressive affective disorder, recurrent episode, in full remission                             |
| <b>29682</b> | Atypical depressive disorder                                                                          |
| <b>311</b>   | Depressive disorder, not elsewhere classified                                                         |

**Table S2. List of ICD-10 CM and ICD-9 codes used to define bipolar disorder.**

| <b>ICD-10 CM / DESCRIPTION</b> |                                                                                     |
|--------------------------------|-------------------------------------------------------------------------------------|
| <b>ICD-9</b>                   |                                                                                     |
| <b>F310</b>                    | Bipolar disorder, current episode hypomanic                                         |
| <b>F3110</b>                   | Bipolar disorder, current episode manic without psychotic features, unspecified     |
| <b>F3111</b>                   | Bipolar disorder, current episode manic without psychotic features, mild            |
| <b>F3112</b>                   | Bipolar disorder, current episode manic without psychotic features, moderate        |
| <b>F3113</b>                   | Bipolar disorder, current episode manic without psychotic features, severe          |
| <b>F312</b>                    | Bipolar disorder, current episode manic severe with psychotic features              |
| <b>F3130</b>                   | Bipolar disorder, current episode depressed, mild or moderate severity, unspecified |
| <b>F3131</b>                   | Bipolar disorder, current episode depressed, mild                                   |
| <b>F3132</b>                   | Bipolar disorder, current episode depressed, moderate                               |
| <b>F314</b>                    | Bipolar disorder, current episode depressed, severe, without psychotic features     |
| <b>F315</b>                    | Bipolar disorder, current episode depressed, severe, with psychotic features        |
| <b>F3160</b>                   | Bipolar disorder, current episode mixed, unspecified                                |
| <b>F3161</b>                   | Bipolar disorder, current episode mixed, mild                                       |

|              |                                                                             |
|--------------|-----------------------------------------------------------------------------|
| <b>F3162</b> | Bipolar disorder, current episode mixed, moderate                           |
| <b>F3163</b> | Bipolar disorder, current episode mixed, severe, without psychotic features |
| <b>F3164</b> | Bipolar disorder, current episode mixed, severe, with psychotic features    |
| <b>F3170</b> | Bipolar disorder, currently in remission, most recent episode unspecified   |
| <b>F3171</b> | Bipolar disorder, in partial remission, most recent episode hypomanic       |
| <b>F3172</b> | Bipolar disorder, in full remission, most recent episode hypomanic          |
| <b>F3173</b> | Bipolar disorder, in partial remission, most recent episode manic           |
| <b>F3174</b> | Bipolar disorder, in full remission, most recent episode manic              |
| <b>F3175</b> | Bipolar disorder, in partial remission, most recent episode depressed       |
| <b>F3176</b> | Bipolar disorder, in full remission, most recent episode depressed          |
| <b>F3177</b> | Bipolar disorder, in partial remission, most recent episode mixed           |
| <b>F3178</b> | Bipolar disorder, in full remission, most recent episode mixed              |
| <b>F3181</b> | Bipolar II disorder                                                         |
| <b>F3189</b> | Other bipolar disorder                                                      |
| <b>F319</b>  | Bipolar disorder, unspecified                                               |
| <b>29600</b> | Bipolar I disorder, single manic episode, unspecified                       |

|              |                                                                                                           |
|--------------|-----------------------------------------------------------------------------------------------------------|
| <b>29601</b> | Bipolar I disorder, single manic episode, mild                                                            |
| <b>29602</b> | Bipolar I disorder, single manic episode, moderate                                                        |
| <b>29603</b> | Bipolar I disorder, single manic episode, severe, without mention of psychotic behavior                   |
| <b>29604</b> | Bipolar I disorder, single manic episode, severe, specified as with psychotic behavior                    |
| <b>29605</b> | Bipolar I disorder, single manic episode, in partial or unspecified remission                             |
| <b>29606</b> | Bipolar I disorder, single manic episode, in full remission                                               |
| <b>29640</b> | Bipolar I disorder, most recent episode (or current) manic, unspecified                                   |
| <b>29641</b> | Bipolar I disorder, most recent episode (or current) manic, mild                                          |
| <b>29642</b> | Bipolar I disorder, most recent episode (or current) manic, moderate                                      |
| <b>29643</b> | Bipolar I disorder, most recent episode (or current) manic, severe, without mention of psychotic behavior |
| <b>29644</b> | Bipolar I disorder, most recent episode (or current) manic, severe, specified as with psychotic behavior  |
| <b>29645</b> | Bipolar I disorder, most recent episode (or current) manic, in partial or unspecified remission           |
| <b>29646</b> | Bipolar I disorder, most recent episode (or current) manic, in full remission                             |
| <b>29650</b> | Bipolar I disorder, most recent episode (or current) depressed, unspecified                               |
| <b>29651</b> | Bipolar I disorder, most recent episode (or current) depressed, mild                                      |



|              |                                                                                                               |
|--------------|---------------------------------------------------------------------------------------------------------------|
| <b>29652</b> | Bipolar I disorder, most recent episode (or current) depressed, moderate                                      |
| <b>29653</b> | Bipolar I disorder, most recent episode (or current) depressed, severe, without mention of psychotic behavior |
| <b>29654</b> | Bipolar I disorder, most recent episode (or current) depressed, severe, specified as with psychotic behavior  |
| <b>29655</b> | Bipolar I disorder, most recent episode (or current) depressed, in partial or unspecified remission           |
| <b>29656</b> | Bipolar I disorder, most recent episode (or current) depressed, in full remission                             |
| <b>29660</b> | Bipolar I disorder, most recent episode (or current) mixed, unspecified                                       |
| <b>29661</b> | Bipolar I disorder, most recent episode (or current) mixed, mild                                              |
| <b>29662</b> | Bipolar I disorder, most recent episode (or current) mixed, moderate                                          |
| <b>29663</b> | Bipolar I disorder, most recent episode (or current) mixed, severe, without mention of psychotic behavior     |
| <b>29664</b> | Bipolar I disorder, most recent episode (or current) mixed, severe, specified as with psychotic behavior      |
| <b>29665</b> | Bipolar I disorder, most recent episode (or current) mixed, in partial or unspecified remission               |
| <b>29666</b> | Bipolar I disorder, most recent episode (or current) mixed, in full remission                                 |
| <b>2967</b>  | Bipolar I disorder, most recent episode (or current) unspecified                                              |

|              |                               |
|--------------|-------------------------------|
| <b>29680</b> | Bipolar disorder, unspecified |
| <b>29681</b> | Atypical manic disorder       |
| <b>29689</b> | Other bipolar disorders       |

**Table S3. List of ICD-10 CM and ICD-9 codes used to define anxiety disorders.**

| <b>ICD-10 CM / DESCRIPTION</b> |                                              |
|--------------------------------|----------------------------------------------|
| <b>ICD-9</b>                   |                                              |
| <b>F410</b>                    | Panic disorder [episodic paroxysmal anxiety] |
| <b>F411</b>                    | Generalized anxiety disorder                 |
| <b>F412</b>                    | Mixed anxiety and depressive disorder        |
| <b>F413</b>                    | Other mixed anxiety disorders                |
| <b>F418</b>                    | Other specified anxiety disorders            |
| <b>F419</b>                    | Anxiety disorder, unspecified                |
| <b>30000</b>                   | Anxiety state, unspecified                   |
| <b>30001</b>                   | Panic disorder without agoraphobia           |
| <b>30002</b>                   | Generalized anxiety disorder                 |
| <b>30009</b>                   | Other anxiety states                         |

**Table S4. List of ICD-10 CM and ICD-9 codes used to define stress disorders.**

| <b>ICD-10 CM / DESCRIPTION</b> |                                                                    |
|--------------------------------|--------------------------------------------------------------------|
| <b>ICD-9</b>                   |                                                                    |
| <b>F430</b>                    | Acute stress reaction                                              |
| <b>F4310</b>                   | Post-traumatic stress disorder, unspecified                        |
| <b>F4311</b>                   | Post-traumatic stress disorder, acute                              |
| <b>F4312</b>                   | Post-traumatic stress disorder, chronic                            |
| <b>F4320</b>                   | Adjustment disorder, unspecified                                   |
| <b>F4321</b>                   | Adjustment disorder with depressed mood                            |
| <b>F4322</b>                   | Adjustment disorder with anxiety                                   |
| <b>F4323</b>                   | Adjustment disorder with mixed anxiety and depressed mood          |
| <b>F4324</b>                   | Adjustment disorder with disturbance of conduct                    |
| <b>F4325</b>                   | Adjustment disorder with mixed disturbance of emotions and conduct |
| <b>F4329</b>                   | Adjustment disorder with other symptoms                            |
| <b>F4381</b>                   | Prolonged grief disorder                                           |
| <b>F4389</b>                   | Other reactions to severe stress                                   |

|              |                                                                           |
|--------------|---------------------------------------------------------------------------|
| <b>F439</b>  | Reaction to severe stress, unspecified                                    |
| <b>3090</b>  | Adjustment disorder with depressed mood                                   |
| <b>3091</b>  | Prolonged depressive reaction                                             |
| <b>30921</b> | Separation anxiety disorder                                               |
| <b>30922</b> | Emancipation disorder of adolescence and early adult life                 |
| <b>30924</b> | Adjustment disorder with anxiety                                          |
| <b>30928</b> | Adjustment disorder with mixed anxiety and depressed mood                 |
| <b>30929</b> | Other adjustment reactions with predominant disturbance of other emotions |
| <b>3093</b>  | Adjustment disorder with disturbance of conduct                           |
| <b>3094</b>  | Adjustment disorder with mixed disturbance of emotions and conduct        |
| <b>30981</b> | Posttraumatic stress disorder                                             |
| <b>30982</b> | Adjustment reaction with physical symptoms                                |
| <b>30983</b> | Adjustment reaction with withdrawal                                       |
| <b>30989</b> | Other specified adjustment reactions                                      |
| <b>3099</b>  | Unspecified adjustment reaction                                           |
| <b>3083</b>  | Other acute reactions to stress                                           |

|             |                                       |
|-------------|---------------------------------------|
| <b>3084</b> | Mixed disorders as reaction to stress |
| <b>3089</b> | Unspecified acute reaction to stress  |

**Table S5. Distribution of Neighborhood NatureScore groups**

| <b>NatureScore group</b>                          | <b>N (%)</b> | <b>Mean (SD)</b> | <b>Median (IQR)</b> | <b>Range (Min-Max)</b> |
|---------------------------------------------------|--------------|------------------|---------------------|------------------------|
| <b>Overall</b>                                    | 1,169 (100)  | 77.21 (21.96)    | 85.8 (64.8–94.7)    | 1.2 – 100              |
| <b>Nature Deficient / Nature Light<br/>(0-39)</b> | 94 (8.04)    | 26.65 (10.94)    | 30.35 (19.5–36.8)   | 1.2 – 39.9             |
| <b>Nature Adequate<br/>(40-59)</b>                | 159 (13.60)  | 51.07 (6.01)     | 50.3 (46.7–57.0)    | 40 – 59.9              |
| <b>Nature Rich<br/>(60-79)</b>                    | 246 (21.04)  | 71.03 (5.57)     | 71.5 (66.6–75.9)    | 60.3 – 79.7            |
| <b>Nature Utopia<br/>(80-100)</b>                 | 670 (57.31)  | 92.76 (5.25)     | 93.4 (89.1–97.4)    | 80 – 100               |

N: Number of zipcodes; %: percentage; SD: standard deviation; IQR: inter-quartile range; Min: minimum; Max: maximum

**Table S6. Multivariable regression results for depression stratified by black population in each zipcode.**

| Black population <10%                  |                       |         | Black population 10+% |         |
|----------------------------------------|-----------------------|---------|-----------------------|---------|
| No. of Zipcodes                        | 700                   |         | 416                   |         |
|                                        | aRR (95%CI)           | P-value | aRR (95%CI)           | P-value |
| <b>NatureScore Categories</b>          |                       |         |                       |         |
| <b>Nature Deficient / Nature Light</b> | Reference             |         | Reference             |         |
| <b>Nature Adequate</b>                 | 1.221 (0.913 - 1.632) | 0.178   | 0.905 (0.529 - 1.548) | 0.716   |
| <b>Nature Rich</b>                     | 1.103 (0.866 - 1.404) | 0.427   | 0.737 (0.432 - 1.259) | 0.265   |
| <b>Nature Utopia</b>                   | 0.930 (0.751 - 1.152) | 0.509   | 0.724 (0.419 - 1.253) | 0.249   |

aRR: adjusted rate ratio; CI: confidence interval; No: number; %: percentage



**Table S7. Multivariable regression results for bipolar stratified by black population in each zipcode.**

| Stratification by Hispanic Population in Zipcode    |                             |         |                             |              |
|-----------------------------------------------------|-----------------------------|---------|-----------------------------|--------------|
|                                                     | Hispanic population <10%    |         | Hispanic population 10+%    |              |
| No. of Zipcodes                                     | 594                         |         | 422                         |              |
|                                                     | aRR (95%CI)                 | P-value | aRR (95%CI)                 | P-value      |
| NatureScore Categories                              |                             |         |                             |              |
| Nature Deficient / Nature Light                     | Reference                   |         | Reference                   |              |
| Nature Adequate                                     | 1.074 (0.566 – 2.039)       | 0.826   | 0.689 (0.448 - 1.062)       | 0.092        |
| Nature Rich                                         | 1.090 (0.572 – 2.078)       | 0.793   | 0.719 (0.475 – 1.091)       | 0.121        |
| Nature Utopia                                       | 0.744 (0.392 - 1.412)       | 0.366   | 0.629 (0.404 – 0.979)       | <b>0.040</b> |
| Stratification by Educational Attainment in Zipcode |                             |         |                             |              |
|                                                     | Educational Attainment <25% |         | Educational Attainment 25+% |              |
| No. of Zipcodes                                     | 561                         |         | 455                         |              |
|                                                     | aRR (95%CI)                 | P-value | aRR (95%CI)                 | P-value      |
| NatureScore Categories                              |                             |         |                             |              |
| Nature Deficient / Nature Light                     | Reference                   |         | Reference                   |              |

|                        |                       |              |                       |              |
|------------------------|-----------------------|--------------|-----------------------|--------------|
| <b>Nature Adequate</b> | 1.398 (1.019 – 1.916) | <b>0.037</b> | 0.425 (0.214 – 0.844) | <b>0.014</b> |
| <b>Nature Rich</b>     | 1.363 (1.011 – 1.837) | <b>0.042</b> | 0.391 (0.197 – 0.772) | <b>0.007</b> |
| <b>Nature Utopia</b>   | 1.264 (0.952 - 1.679) | 0.106        | 0.311 (0.159 – 0.608) | <b>0.001</b> |

aRR: adjusted rate ratio; CI: confidence interval; No: number; %: percentage
